# Supplementary material
Source: publisher site journal article supplement (https://www.dovepress.com/article/552629)
Supplement: Supplementary file 1 [file supplementary%20figure_1.docx]

（a）


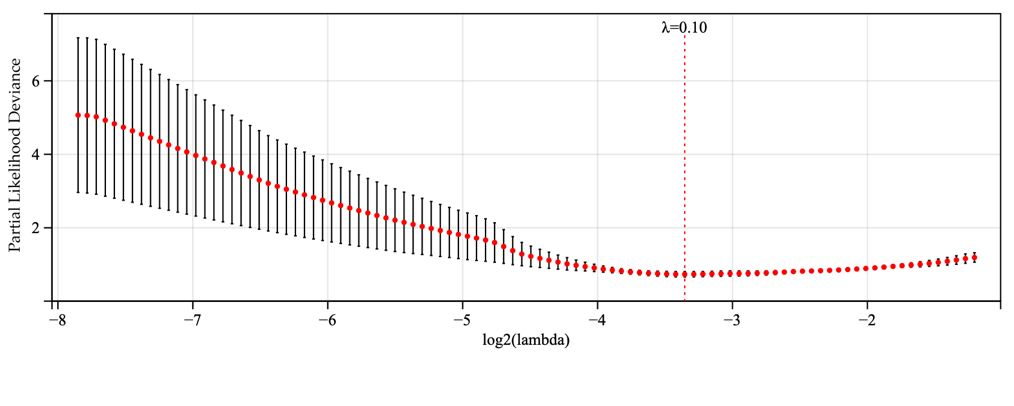


（b）


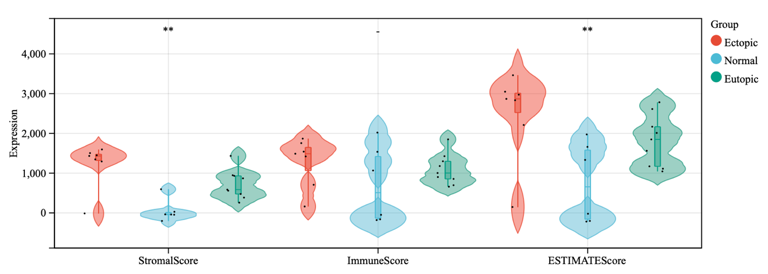


**Figure S1.** （a）Candidate m6A regulators were screening out and 3-fold cross-validation for shrinking parameters. （b）Immune Score, Stromal Score, and ESTIMATE Score for ectopic, normal, and EU samples. not significant, p ≥ 0.05；*p < 0.05，** p < 0.01, ***p < 0.001.


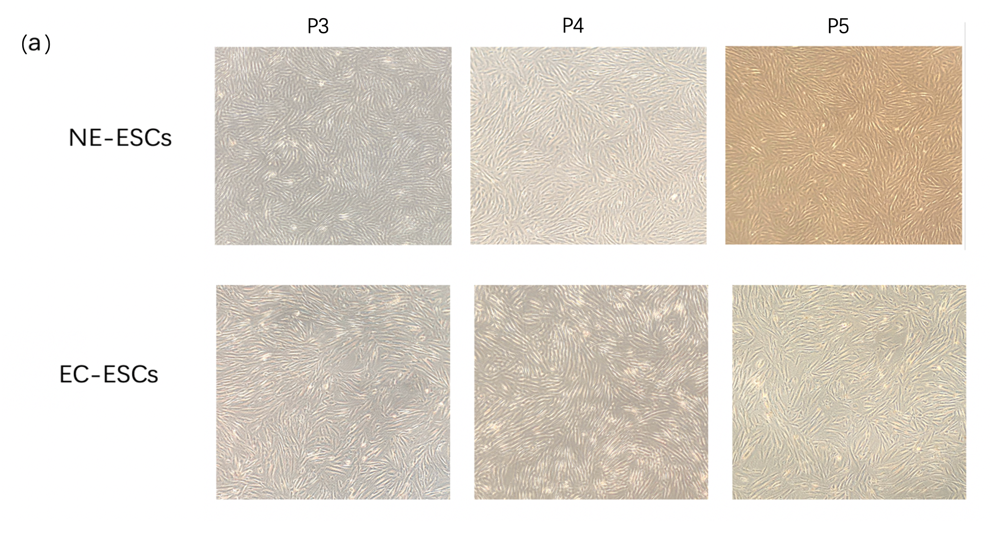


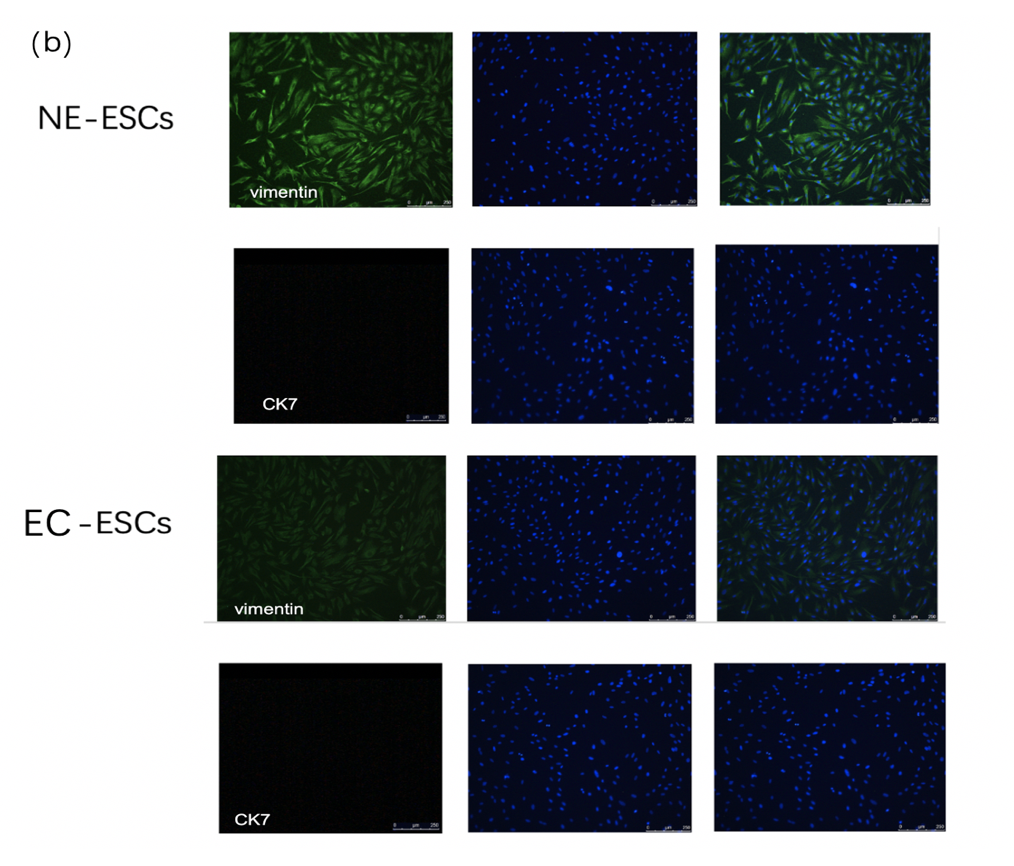


**Figure S2.** Morphology and identification of primary endometrial stromal cells. (a) Endometrial stromal cell morphology under light microscopy. (b) Endometrial stromal cell identification with nuclei stained with DAPI.

**Figure S3.** qPCR was used to detect the effect of transfection of METTL3 and YTHDF2 on mRNA expression levels in ovarian endometriotic stromal cells. not significant, p ≥ 0.05；*p < 0.05，** p < 0.01, ***p < 0.001.
